# Supplementary material
Source: publisher site journal article supplement (https://www.dovepress.com/article/441141)

## Supplementary Material

**Figure S1:** IC<sub>50</sub> determination of CAP on BEAS-2B cells. **a** The IC<sub>50</sub> of CAP treatment on BEAS-2B cells at 12 hours is 445.9  $\mu$ M. **b** The IC<sub>50</sub> of CAP treatment on BEAS-2B cells at 24 hours is 350.2  $\mu$ M.

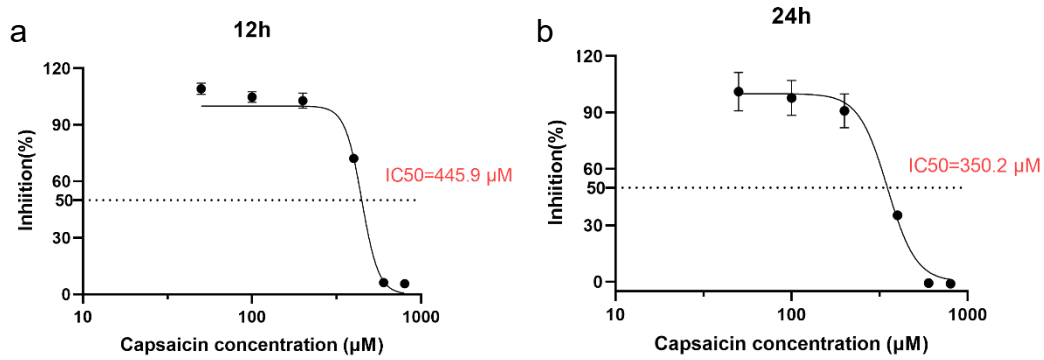

**Figure S2:** MTS assay to evaluate the impact of different treatments on the viability of BEAS-2B cells. **a** Changes in the viability of LPS-stimulated BEAS-2B cells treated with CAP. **b** The effects of LPS, TRPV1 inhibitors, and AKT activators on the viability of BEAS-2B cells. **c** Detection of the viability of BEAS-2B cells to determine the nature of autophagy after 6 hours of LPS treatment. (n=3) \*\*P < 0.01, \*\*\*P < 0.001, \*\*\*\*P < 0.0001.

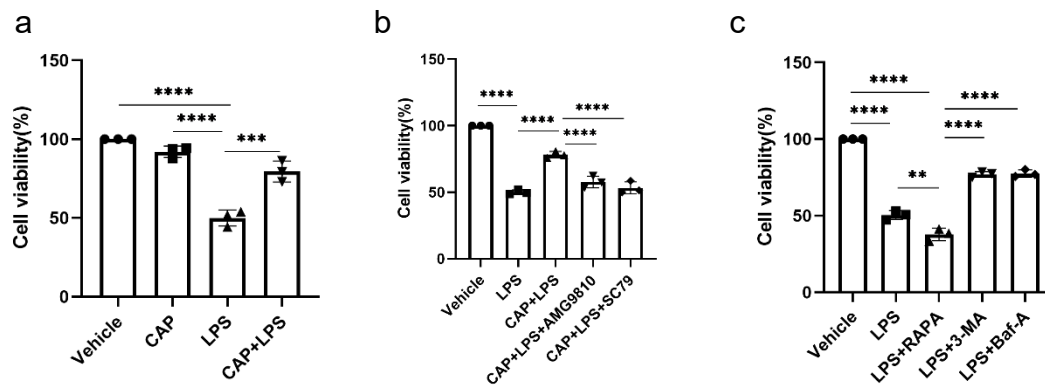

Supplement: Supplementary file 1 [file get_supplementary_file.php]
